# Supplementary material for: Nonclassical antagonism between human lysozyme and AMPs against Pseudomonas aeruginosa
Source: PubMed Central journal article supplement (PMC7931236; doi:10.1002/2211-5463.13094), 2021-02-05
Supplement: FEB4-11-705-s001.pdf [file FEB4-11-705-s001.pdf]

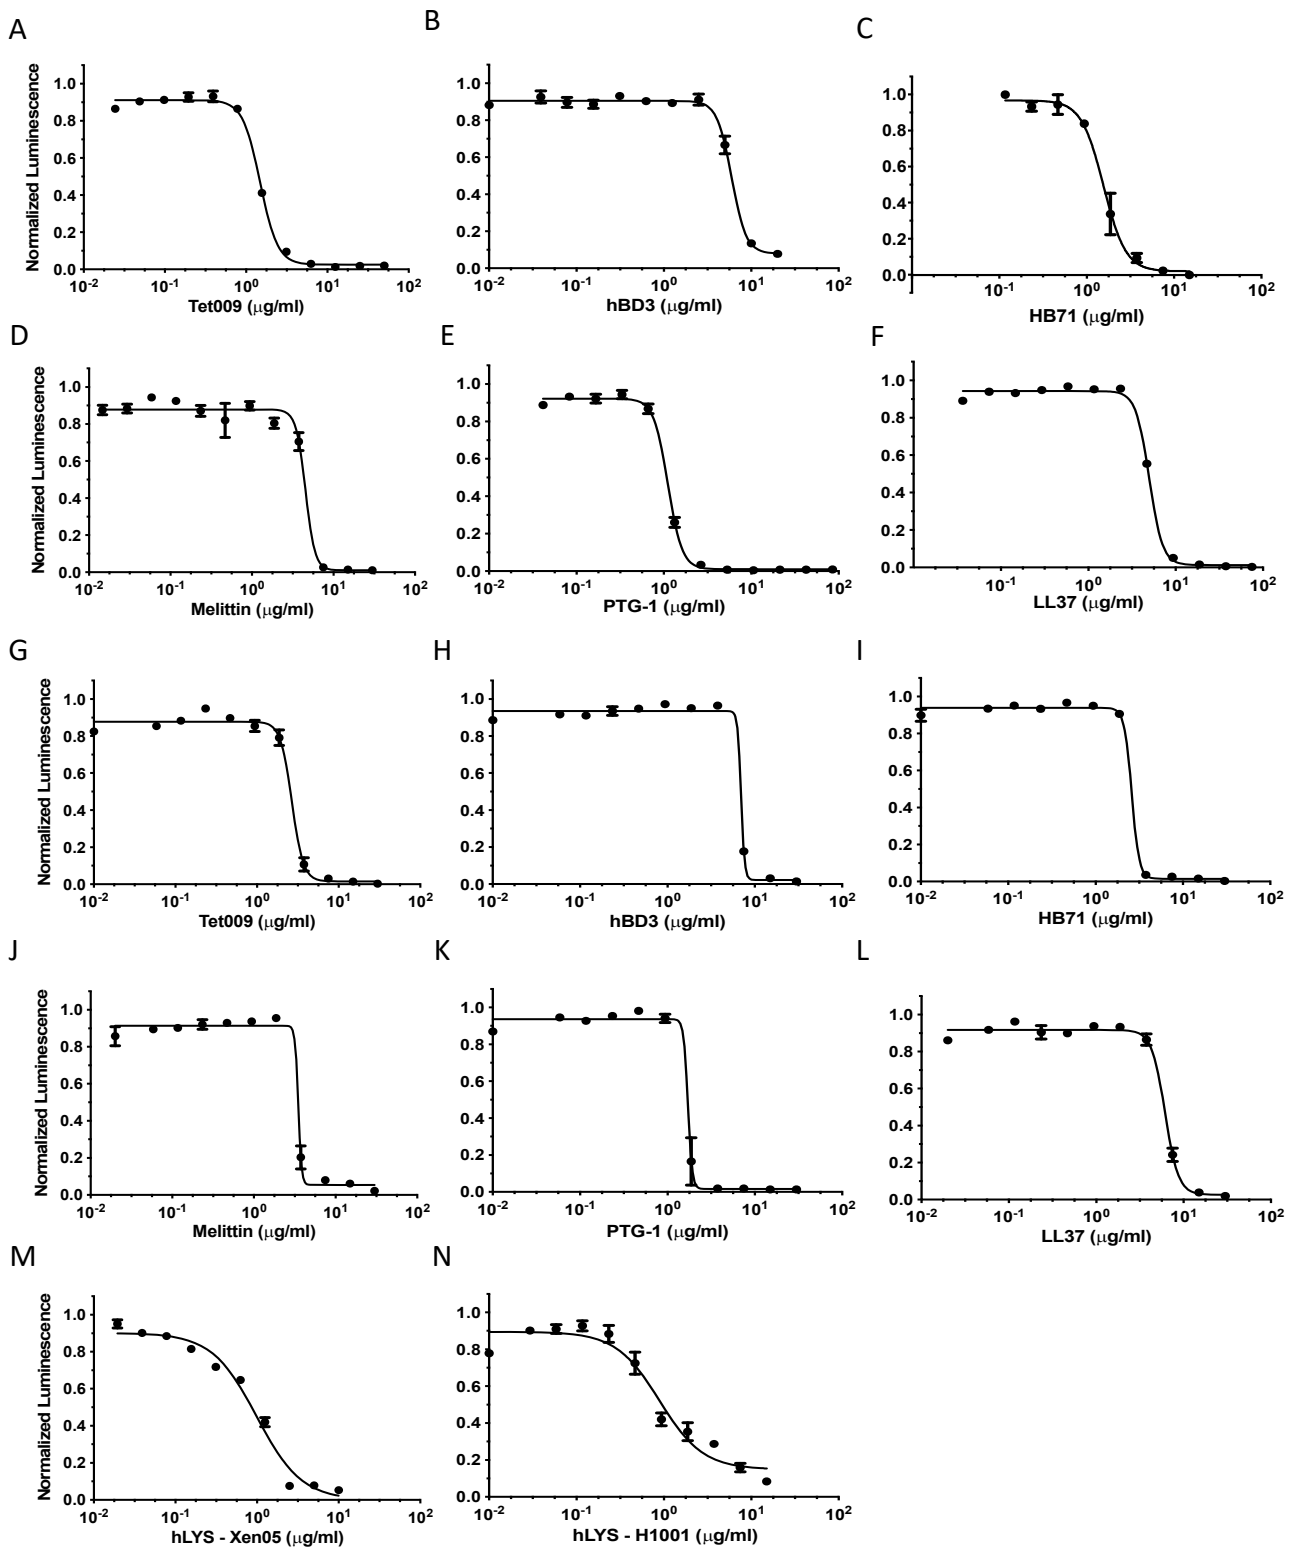

**Fig. S1** - Dose response curves of each antimicrobial agent against *P. aeruginosa* strains Xen05 (A-F, M) and H1001 (G-L, N). 95% confidence intervals for EC50 values in  $\mu\text{g/ml}$ : (A) 1.4-1.5; (B) 5.5-6.5; (C) 1.4-1.8; (D) 3.8-5.4; (E) 1.1-1.2; (F) 4.8-5.1; (G) 2.5-2.9; (H) 6.9-7.1; (J) 3.4-3.6; (K) 1.6-1.8; (L) 5.7-6.6; (M) 800-1200; (N) 700-1100. Experiments were conducted as technical triplicate or quadruplicate measurements and were repeated at least twice.
