# Supplementary material for: Nonclassical antagonism between human lysozyme and AMPs against Pseudomonas aeruginosa
Source: PubMed Central journal article supplement (PMC7931236; doi:10.1002/2211-5463.13094), 2021-02-05
Supplement: FEB4-11-705-s003.pdf [file FEB4-11-705-s003.pdf]

**Table S1. Literature Review of AMP Interactions with Lysozyme**

| <b>AMP</b>       | <b>Interaction</b> | <b>Reference</b>       |
|------------------|--------------------|------------------------|
| AS-48            | Synergy            | (1) (2)                |
| Bactenecin       | Additive           | (3)                    |
| GMAP2            | Synergy            | (4) (5)                |
| hBD1             | Synergy            | (6)                    |
|                  | Additive           | (7)                    |
| hBD2             | Synergy            | (6) (8)                |
|                  | Additive           | (7)                    |
| hBD3             | Synergy            | (6) (9) (10)           |
| H-GADDDDD-OH     | Additive           | (11)                   |
| Indolicidin      | Additive           | (3)                    |
| Lactoferrin      | Synergy            | (7) (12) (13) (14)     |
|                  | Additive           | (15) (16)              |
| Lactoferricin    | Synergy            | (17)                   |
|                  | Additive           | (18)                   |
| LL37             | Synergy            | (6) (7) (10) (19) (20) |
|                  | Additive           | (3)                    |
| Nisin            | Synergy            | (21) (16) (22)         |
| OaBac5mini       | Synergy            | (16)                   |
| Parasin 1        | Synergy            | (23)                   |
| Polymyxin B      | Synergy            | (16)                   |
| PTG-1            | Synergy/Additive   | (3)                    |
| Puroindoline A+B | Synergy            | (13)                   |
| SLPI             | Synergy            | (7)                    |
| SMAP29           | Additive           | (16)                   |

## Table S1 – References

1. Ananou S, Rivera S, Madrid MI, Maqueda M, Martínez-Bueno M, Valdivia E. 2018. Application of enterocin AS-48 as biopreservative in eggs and egg fractions: Synergism through lysozyme. *LWT - Food Science and Technology* 89:409-417.
2. Aguilar-Pérez C, Gracia B, Rodrigues L, Vitoria A, Cebrián R, Deboosère N, Song O-r, Brodin P, Maqueda M, Aínsa JA. 2018. Synergy between circular bacteriocin AS-48 and ethambutol against *Mycobacterium tuberculosis*. *Antimicrobial Agents and Chemotherapy* 62:e00359-18.
3. Yan H, Hancock REW. 2001. Synergistic Interactions between Mammalian Antimicrobial Defense Peptides. *Antimicrobial Agents and Chemotherapy* 45:1558-1560.
4. Sowa-Jasińek A, Zydbicka-Barabas A, Staczek S, Wydrych J, Mak P, Jakubowicz T, Cytryńska M. 2014. Studies on the role of insect hemolymph polypeptides: *Galleria mellonella* anionic peptide 2 and lysozyme. *Peptides* 53:194-201.
5. Zydbicka-Barabas A, Mak P, Klys A, Skrzypiec K, Mendyk E, Fiołka MJ, Cytryńska M. 2012. Synergistic action of *Galleria mellonella* anionic peptide 2 and lysozyme against gram-negative bacteria. *Biochimica et Biophysica Acta* 1818:2623-2635.
6. Chen X, Niyonsaba F, Ushio H, Okuda D, Nagaoka I, Ikeda S, Okumura K, Ogawa H. 2005. Synergistic effect of antibacterial agents human beta-defensins, cathelicidin LL-37 and lysozyme against *Staphylococcus aureus* and *Escherichia coli*. *Journal of Dermatological Science* 40:123-132.
7. Singh PK, Tack BF, Jr PBM, Welsh MJ. 2000. Synergistic and additive killing by antimicrobial factors found in human airway surface liquid. *American Journal of Physiology-Lung Cellular and Molecular Physiology* 279:L799-L805.
8. Lee H-Y, Andalibi A, Webster P, Moon S-K, Teufert K, Kang S-H, Li J-D, Nagura M, Ganz T, Lim DJ. 2004. Antimicrobial activity of innate immune molecules against *Streptococcus pneumoniae*, *Moraxella catarrhalis* and nontypeable *Haemophilus influenzae*. *BMC Infectious Diseases* 4.
9. Maisetta G, Batoni G, Esin S, Luperini F, Pardini M, Bottai D, Florio W, Giuca MR, Gabriele M, Campa M. 2003. Activity of human beta-defensin 3 alone or combined with other antimicrobial agents against oral bacteria. *Antimicrobial Agents and Chemotherapy* 47:3349-3351.
10. Alaiwa MHA, Reznikov LR, Gansemer ND, Sheets KA, Horswill AR, Stoltz DA, Zabner J, Welsh MJ. 2014. pH modulates the activity and synergism of the airway surface liquid antimicrobials beta-defensin-3 and LL-37. *PNAS* 111:18703-18708.
11. Kalfa V, Brogden K. 1999. Anionic antimicrobial peptide-lysozyme interactions in innate pulmonary immunity. *International Journal of Antimicrobial Agents*:47-51.
12. André G, Politano W, Mirza S, Converso T, Ferraz L, Darrieux M. 2015. Combined effects of lactoferrin and lysozyme on *Streptococcus pneumoniae* killing. *Microbial Pathogenesis* 89:7-17.
13. Palumbo D, Iannaccone M, Porta A, Capparelli R. 2010. Experimental antibacterial therapy with puroindolines, lactoferrin and lysozyme in *Listeria monocytogenes* - infected mice. *Microbes and Infection* 12:538-545.
14. Leitch E, Willcox M. 1999. Elucidation of the antistaphylococcal action of lactoferrin and lysozyme. *Journal of Medical Microbiology* 48:867-871.
15. Ellison R, III, Giehl TJ. 1991. Killing of gram-negative bacteria by lactoferrin and lysozyme. *Journal of Clinical Investigation* 88:1080-1091.
16. Linden DSvd, Short D, Dittmann A, Yu P-L. 2009. Synergistic effects of ovine-derived cathelicidins and other antimicrobials against *Escherichia coli* O157:H7 and *Staphylococcus aureus* 1056 MRSA. *Biotechnology Letters* 31:1265-1267.
17. Facon MJ, Skura BJ. 1996. Antibacterial activity of lactoferrin, lysozyme and EDTA against *Salmonella enteritidis*. *International Dairy Journal* 6:303-313.
18. El-Sayed E, Mahfouz M, Abdelsalam A, Gawad IAE, Naim H. 2003. Antimicrobial activity of recombinant bovine lactoferrin and lactoferrin B and glycosylated human lysozyme. *Milk Science International - Milchwissenschaft* 58:266-270.
19. Bals R, Wang X, Zasloff M, Wilson JM. 1998. The peptide antibiotic LL-37/hCAP-18 is expressed in epithelia of the human lung where it has broad antimicrobial activity at the airway surface. *PNAS* 95:9541-9546.
20. Travis SM, Singh PK, Welsh MJ. 2001. Antimicrobial peptides and proteins in the innate defense of the airway surface. *Current Opinion in Immunology* 13:89-95.
21. Chung W, Hancock REW. 2000. Action of lysozyme and nisin mixtures against lactic acid bacteria. *International Journal of Food Microbiology* 60:25-32.
22. Sobrino-López A, Martín-Belloso O. 2008. Enhancing the lethal effect of high-intensity pulsed electric field in milk by antimicrobial compounds as combined hurdles. *Journal of Dairy Science* 91:1759-1768.
23. Zhao H, Tang J, Cao L, Jia G, Long D, Liu G, Chen X, Cai J, Shang H. 2015. Characterization of bioactive recombinant antimicrobial parasin I fused with human lysozyme expressed in the yeast *Pichia pastoris* system. *Enzyme and Microbial Technology* 77:61-67.
